# Supplementary material
Source: PubMed Central journal article supplement (PMC7272295)

**A**

**Control**

**shCdc42**

**Cdc42**

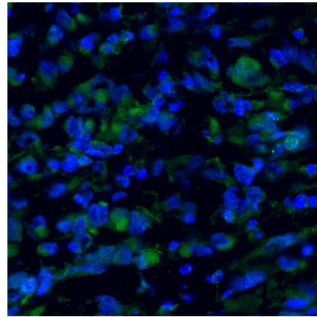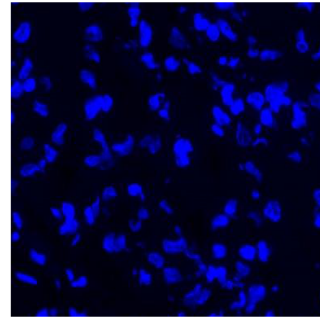

**B-pix**

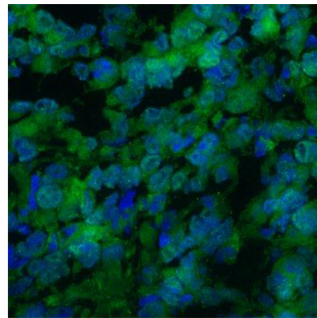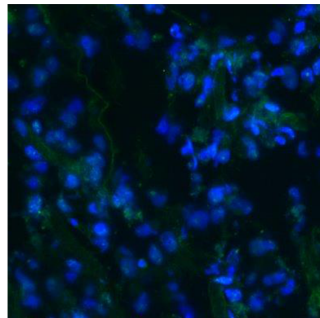

**RET**

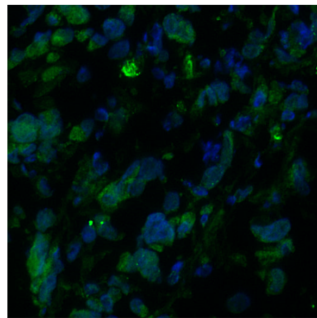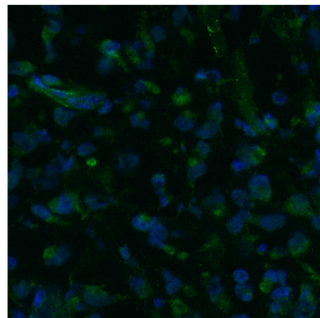

**p-RET**

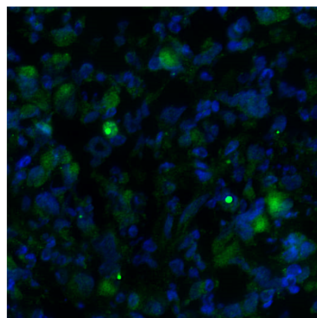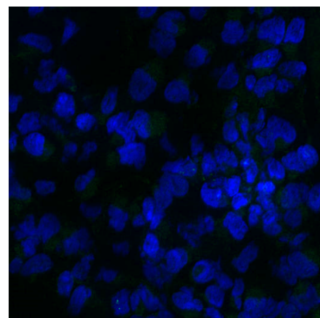

**B**

**H&E**

**GTP-Cdc42**

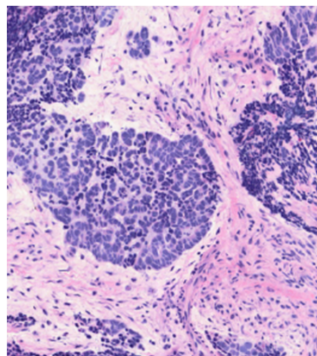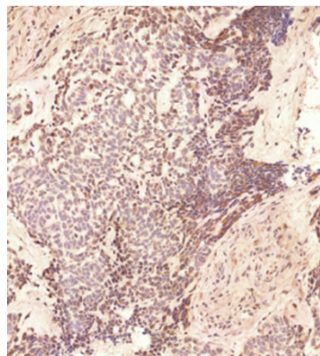

Supplement: NIHMS1565727-supplement-1.pdf [file NIHMS1565727-supplement-1.pdf]
